# Supplementary material for: Nitrogen Doped Intercalation TiO2/TiN/Ti3C2Tx Nanocomposite Electrodes with Enhanced Pseudocapacitance
Source: MDPI journal article supplement (doi:10.3390/nano10020345), 2020-02-18
Supplement: s1 [file s1]

# Nitrogen doped intercalation $\text{TiO}_2/\text{TiN}/\text{Ti}_3\text{C}_2\text{T}_x$ nanocomposite electrodes with enhanced pseudocapacitance

Ben Yang <sup>1</sup>, Yin She <sup>1,2,\*</sup>, Changgeng Zhang <sup>1</sup>, Shuai Kang <sup>3</sup>, Jin Zhou <sup>4</sup>, Wei Hu <sup>1,\*</sup>

<sup>1</sup> Key Laboratory of Optoelectronic Technology and System of Ministry of Education, College of Optoelectronic Engineering, Chongqing University, Chongqing 400044, China; [201908021058@cqu.edu.cn](mailto:201908021058@cqu.edu.cn) (B. Y.); [sheyin@cqu.edu.cn](mailto:sheyin@cqu.edu.cn) (Y. S.); [SillerZ@cqu.edu.cn](mailto:SillerZ@cqu.edu.cn) (C. Z.); [weihu@cqu.edu.cn](mailto:weihu@cqu.edu.cn) (W. H.)

<sup>2</sup> Key Laboratory of Fundamental Science Micro/Nano Device System Technology, Micro System Research Center of Chongqing University, Chongqing 400044, China

<sup>3</sup> Intelligent Manufacturing Technology Institute, Chongqing Institute of Green and Intelligent Technology, Chinese Academy of Sciences, Chongqing 400714, China; [Kangshuai@cigit.ac.cn](mailto:Kangshuai@cigit.ac.cn) (S. K.)

<sup>4</sup> Chongqing Academy of Metrology and Quality Inspection, Chongqing 401121, China; [zhoujin1203@163.com](mailto:zhoujin1203@163.com) (J. Z)

\* Correspondence: [sheyin@cqu.edu.cn](mailto:sheyin@cqu.edu.cn); Tel.: +86-18602361894; [weihu@cqu.edu.cn](mailto:weihu@cqu.edu.cn); Tel.: +86-13896111800

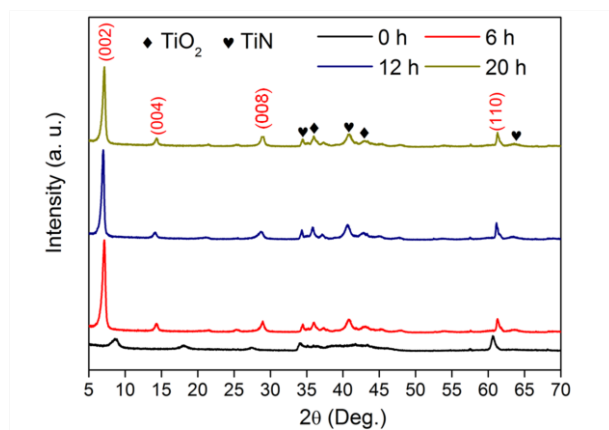

**Figure S1.** XRD patterns of  $\text{Ti}_3\text{C}_2\text{T}_x$  and 6 h, 12 h, 20 h N- $\text{TiO}_2/\text{TiN}/\text{Ti}_3\text{C}_2\text{T}_x$ .

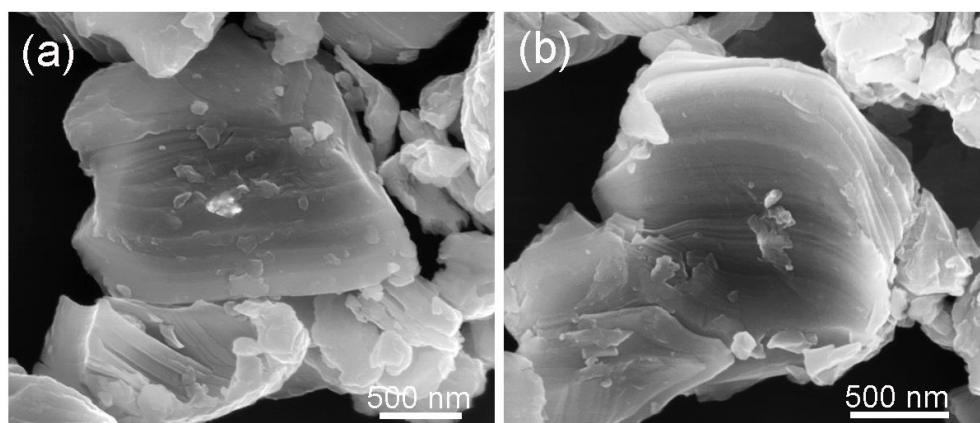

**Figure S2.** High-magnification SEM images of pristine  $\text{Ti}_3\text{AlC}_2$ .

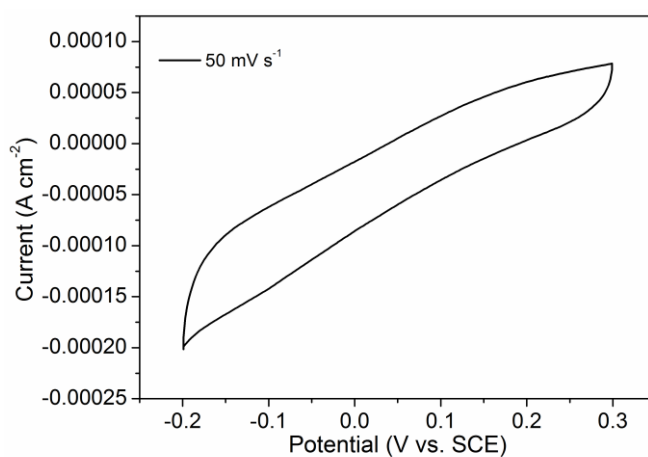

**Figure S3.** CV curves at scan rate of  $50 \text{ mV s}^{-1}$  of conductive carbon paper.

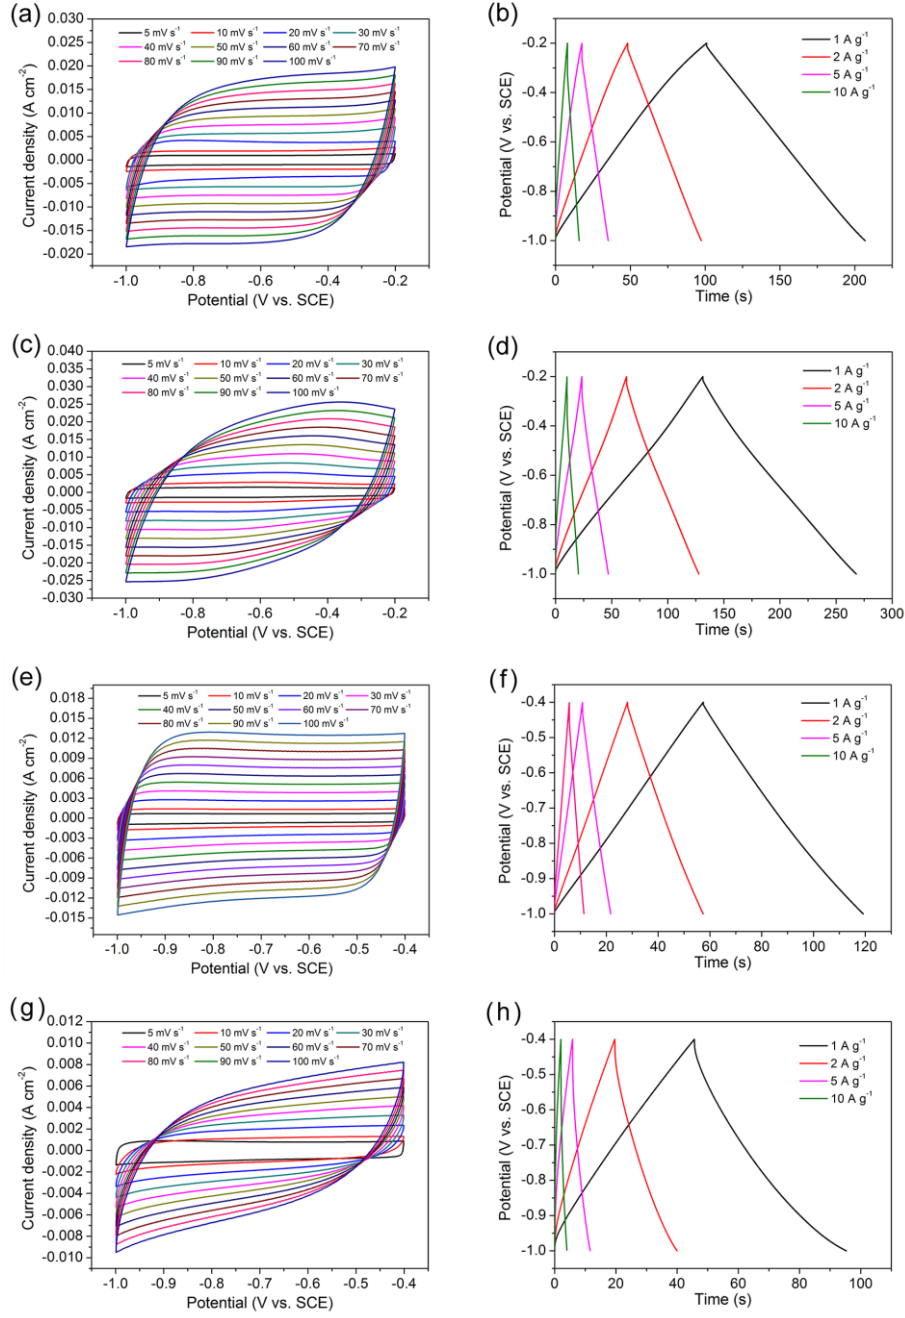

**Figure S4.** CV and GCD curves of  $\text{Ti}_3\text{C}_2\text{Tx}$  in different electrolytes of (a-b)  $\text{Na}_2\text{SO}_4$ , (c-d)  $\text{Li}_2\text{SO}_4$ , (e-f) KOH and (g-h) LiOH.

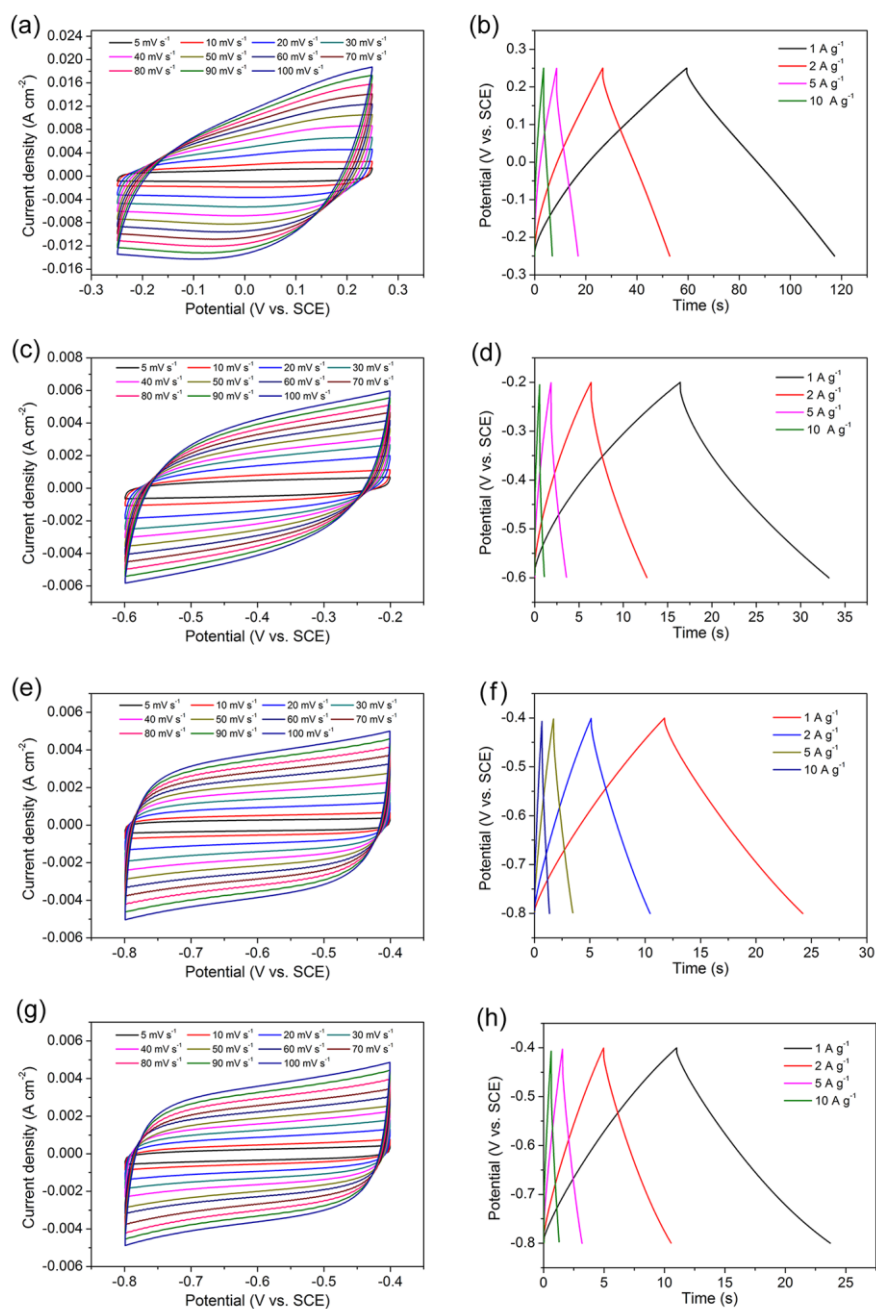

**Figure S5.** CV and GCD curves of 20 h N-TiO<sub>2</sub>/TiN/Ti<sub>3</sub>C<sub>2</sub>T<sub>x</sub> in different electrolytes of (a-b) Na<sub>2</sub>SO<sub>4</sub>, (c-d) Li<sub>2</sub>SO<sub>4</sub>, (e-f) KOH and (g-h) LiOH.

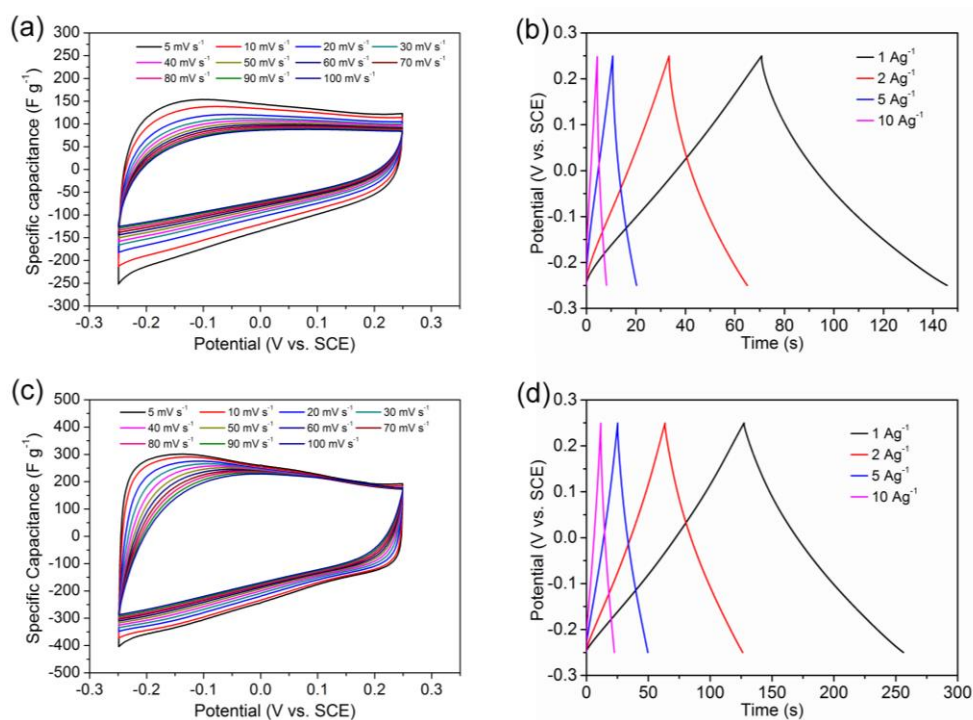

**Figure S6.** CV and GCD curves of (a-b) 6 h, (c-d) 12 h N-TiO<sub>2</sub>/TiN/Ti<sub>3</sub>C<sub>2</sub>T<sub>x</sub> in H<sub>2</sub>SO<sub>4</sub> electrolyte.

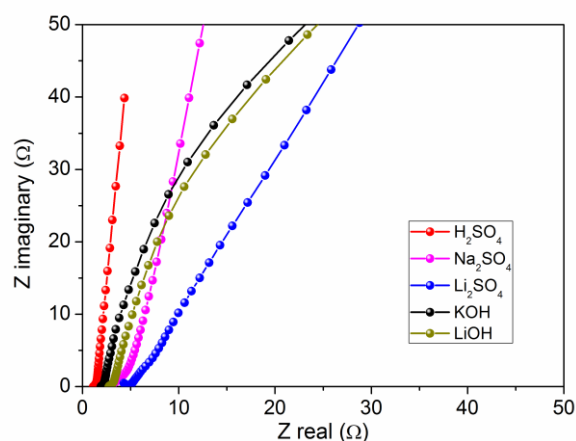

**Figure S7.** Nyquist plots of 20 h N-TiO<sub>2</sub>/TiN/Ti<sub>3</sub>C<sub>2</sub>T<sub>x</sub> in different electrolytes. 1M H<sub>2</sub>SO<sub>4</sub> have lower resistance of the bulk electrolyte solution compared with Na<sub>2</sub>SO<sub>4</sub>, Li<sub>2</sub>SO<sub>4</sub>, KOH and LiOH.

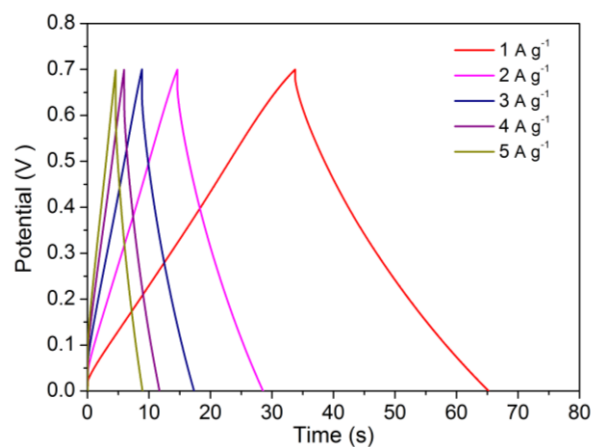

**Figure S8.** GCD plots at different current densities of the symmetric 20 h N-TiO<sub>2</sub>/TiN/Ti<sub>3</sub>C<sub>2</sub>T<sub>x</sub>//20 h N-TiO<sub>2</sub>/TiN/Ti<sub>3</sub>C<sub>2</sub>T<sub>x</sub> supercapacitor in 1 M H<sub>2</sub>SO<sub>4</sub>.

---

## Calculation of specific capacitance

### CV tests

The specific capacitances  $C_s$  was calculated by integrating the discharge portions of the CV plot.

$$C_s = \int IdV / (msV) \quad (1)$$

where  $C_s$  is the specific capacitance of the electrode ( $F\ g^{-1}$ ),  $I$  is the response current under the integrated area of the CV curves (A),  $m$  is the mass of the electrode material (g),  $s$  is the scan rate ( $V\ s^{-1}$ ), and  $V$  is the potential window (V).

### GCD tests

Based on the charge-discharge curve, the specific capacitances  $C_s$  of the electrode can be calculated using:

$$C_s = I\Delta t / (m\Delta V) \quad (2)$$

where  $I$  is the discharge current (A),  $t$  is the discharge time (s),  $m$  is the mass of the electro-active material (g), and  $V$  is the potential window (V).

### Calculation of energy and power densities

The energy ( $E$ ) and power densities ( $P$ ) for the supercapacitors was calculated from CV curves at different current densities using equations (3) and (4), respectively.

$$E = \int VdQ = \int VIdt = I \int Vdt = 0.5C_s \times V^2 / 3.6(Wh / kg) \quad (3)$$

$$P = \frac{E}{t} = E \times \frac{s \times 3.6}{V}(kW / kg) \quad (4)$$

Where  $C_s$  is the specific capacitance ( $F\ g^{-1}$ ),  $I$  is the current density ( $A\ g^{-1}$ ),  $s$  is the scan rate ( $V\ s^{-1}$ ),  $V$  is the potential window (V).
